# Supplementary material for: The effect of anthropogenic emission, meteorological factors, and carbon dioxide on the surface ozone increase in China from 2008 to 2018 during the East Asia summer monsoon season
Source: Copernicus journal article supplement (doi:10.5194/acp-2022-850), 2023-02-06
Supplement: Supplementary file [file acp-2022-850-AC1-supplement.pdf]

## Response to Reviewers

**No.:** ACP-2022-850

**Title:** The effect of anthropogenic emission, meteorological factors, and carbon dioxide on the surface ozone increase in China from 2008 to 2018 during the East Asia summer monsoon season

### **Anonymous referee #1:**

In this study, the authors used an up-to-date regional climate-chemistry-ecology model to quantify the effect of anthropogenic emission, meteorological factors, and carbon dioxide variations on O<sub>3</sub> variation across China and highlighted the importance of considering CO<sub>2</sub> variations. I suggest this article be published with some modifications to improve the clarity of some details and ambiguous presentation. My comments are listed below.

**Response:** We thank referee #1 for careful reading and valuable comments. We have responded to each specific comment in blue below. Please note that the line numbers given below refer to the clean version of the manuscript.

1. The main innovation is the emphasis on the role of CO<sub>2</sub>, but this only occupies a small part of this study. Other effects such as meteorology and emissions have been extensively discussed in previous studies and the authors need to elaborate more on the significance of this study.

**Response:** Thanks. We have added some discussions on this aspect.

### **Changes in manuscript:**

Abstract (L25~28): “Changed CO<sub>2</sub> played a critical role in the variability of O<sub>3</sub> through radiative forcing and isoprene emissions, particularly in southern China, inducing an increase in O<sub>3</sub> on the southeast coast of China (0.28~0.46 ppb) and a decrease in the southwest and central China (-0.51~-0.11 ppb).”

Introduction (L88~96): “Previous studies have mainly focused on the impact of anthropogenic emissions and meteorological factors on the rise of O<sub>3</sub> levels, with limited attention given to the role of CO<sub>2</sub> variations. However, due to the rapid socioeconomic growth in China and the subsequent surge in energy consumption, CO<sub>2</sub> emissions, and concentrations have also increased significantly, particularly in the eastern coastal region (Lv et al., 2020; Ren et al., 2014). Furthermore, given the significant impact of CO<sub>2</sub> on O<sub>3</sub>, it is crucial to evaluate the influence of changes in CO<sub>2</sub> concentration on the maximum daily 8-hour average (MDA8) O<sub>3</sub> concentrations at the surface. Thus, a comprehensive assessment of the impact of anthropogenic emissions, meteorological factors, and CO<sub>2</sub> on surface O<sub>3</sub> is imperative.”

Section 3.4 (L386~393): “In some years, the impact of changed CO<sub>2</sub> can be as significant as or even surpass that of anthropogenic emissions and meteorology (Figure 10). For example, in 2013, CO<sub>2</sub> caused an increase of 0.95 ppb in MDA8 O<sub>3</sub>

in the YRD region, which exceeded that of anthropogenic emissions (0.87 ppb). Similarly, in the PRD region in 2012, the effect of CO<sub>2</sub>, anthropogenic emissions, and meteorology was 1.41, 1.77, and 1.95 ppb, respectively. Even in the NCP in 2010, the impact of CO<sub>2</sub> (0.75 ppb) was comparable to that of anthropogenic emissions (1.5 ppb). In summary, CO<sub>2</sub> has a significant impact on surface O<sub>3</sub> concentrations by influencing radiation and isoprene emissions, with more prominent effects in regions with abundant vegetation.”

## References

- Lu, Q., Liu, H. B., Wang, J. T., Liu, H., and Shang, Y.: Multiscale analysis on spatiotemporal dynamics of energy consumption CO<sub>2</sub> emissions in China: Utilizing the integrated of DMSP-OLS and NPP-VIIRS nighttime light datasets, *Science of the Total Environment*, 703, <https://doi.org/10.1016/j.scitotenv.2019.134394>, 2020.
- Ren, S. G., Yuan, B. L., Ma, X., and Chen, X. H.: International trade, FDI (foreign direct investment) and embodied CO<sub>2</sub> emissions: A case study of Chinas industrial sectors, *China Economic Review*, 28, 123-134, <https://doi.org/10.1016/j.chieco.2014.01.003>, 2014.

2. Line 98-100: Why did you choose ERA-Interim data to evaluate meteorological variables simulation instead of using observations?

**Response:** Thanks. Firstly, observations are considered as the ground truth for meteorological variables and are essential for validating model performance. However, their usefulness in evaluating models is often limited due to their sparse spatial and temporal coverage (Wang et al., 2021). In contrast, reanalysis data, such as ERA-Interim, is a gridded dataset that offers high spatial and temporal resolution with global coverage. It is derived by assimilating observations into a numerical weather prediction model, resulting in a more consistent dataset in both space and time compared to observations (He et al., 2020; Lindsay et al., 2014).

Secondly, reanalysis data can provide a comprehensive set of variables that are not always available from observations. For instance, ERA-Interim includes a wide range of meteorological variables such as wind speed, temperature, precipitation, wind vectors, radiation fields, cloud properties, soil moisture, and relative humidity. These variables are produced by incorporating the observation fields, forecast model, and a four-dimensional variational assimilation system (4D-VAR). Furthermore, ERA-Interim conducts a completely automated bias correction after a series of quality control and blacklist data selection (Balsamo et al., 2015; Nogueira, 2020; Rivas and Stoffelen, 2019).

On the whole, while observations are crucial for model validation, reanalysis data, such as ERA-Interim, provides a more complete and consistent dataset that can be used to evaluate model performance in a variety of contexts. Consequently, the use of reanalysis data to evaluate model performance has become increasingly prevalent in recent years (Pu et al., 2017; Xu et al., 2022; Zhou and Wang, 2016; Liu et al., 2023). In our study, we rely on ERA-Interim data to evaluate meteorological variables

simulation as it provides a long-term record (2015-2018) of these variables at various altitudes (1000, 850, and 200 hPa), and it is derived by assimilating observations into a numerical weather prediction model.

## References

- Balsamo, G., Albergel, C., Beljaars, A., Boussetta, S., Brun, E., Cloke, H., Dee, D., Dutra, E., Munoz-Sabater, J., Pappenberger, F., de Rosnay, P., Stockdale, T., and Vitart, F.: ERA-Interim/Land: a global land surface reanalysis data set, *Hydrology and Earth System Sciences*, 19, 389-407, <https://doi.org/10.5194/hess-19-389-2015>, 2015.
- He, J., Yang, K., Tang, W. J., Lu, H., Qin, J., Chen, Y. Y., and Li, X.: The first high-resolution meteorological forcing dataset for land process studies over China, *Scientific Data*, 7, <https://doi.org/10.1038/s41597-020-0369-y>, 2020.
- Lindsay, R., Wensnahan, M., Schweiger, A., and Zhang, J.: Evaluation of Seven Different Atmospheric Reanalysis Products in the Arctic\*, *Journal of Climate*, 27, 2588-2606, <https://doi.org/10.1175/jcli-d-13-00014.1>, 2014.
- Liu, C., Yang, Y., Wang, H., Ren, L., Wei, J., Wang, P., and Liao, H.: Influence of Spatial Dipole Pattern in Asian Aerosol Changes on East Asian Summer Monsoon, *Journal of Climate*, 36, 1575-1585, 2023.
- Nogueira, M.: Inter-comparison of ERA-5, ERA-interim and GPCP rainfall over the last 40 years: Process-based analysis of systematic and random differences, *Journal of Hydrology*, 583, <https://doi.org/10.1016/j.jhydrol.2020.124632>, 2020.
- Pu, X., Wang, T. J., Huang, X., Melas, D., Zanis, P., Papanastasiou, D. K., and Poupkou, A.: Enhanced surface ozone during the heat wave of 2013 in Yangtze River Delta region, China, *Science of the Total Environment*, 603, 807-816, <https://doi.org/10.1016/j.scitotenv.2017.03.056>, 2017.
- Rivas, M. B. and Stoffelen, A.: Characterizing ERA-Interim and ERA5 surface wind biases using ASCAT, *Ocean Science*, 15, 831-852, <https://doi.org/10.5194/os-15-831-2019>, 2019.
- Wang, Q. F., Zeng, J. Y., Qi, J. Y., Zhang, X. S., Zeng, Y., Shui, W., Xu, Z. H., Zhang, R. R., Wu, X. P., and Cong, J.: A multi-scale daily SPEI dataset for drought characterization at observation stations over mainland China from 1961 to 2018, *Earth System Science Data*, 13, 331-341, <https://doi.org/10.5194/essd-13-331-2021>, 2021.
- Xu, B. Y., Wang, T. J., Ma, D. Y., Song, R., Zhang, M., Gao, L. B., Li, S., Zhuang, B. L., Li, M. M., and Xie, M.: Impacts of regional emission reduction and global climate change on air quality and temperature to attain carbon neutrality in China, *Atmospheric Research*, 279, <https://doi.org/10.1016/j.atmosres.2022.106384>, 2022.
- Zhou, C. L. and Wang, K. C.: Evaluation of Surface Fluxes in ERA-Interim Using Flux Tower Data, *Journal of Climate*, 29, 1573-1582, <https://doi.org/10.1175/jcli-d-15-0523.1>, 2016.

3. Line 134-139: Can you give more descriptions of the model improvement?

**Response:** Thanks. We added some descriptions of the model improvement.

Changes in manuscript:

### 2.3.1 Radiation (L156~168)

“In the previous version of the RegCM-Chem-YIBs model, radiative calculations only accounted for changes in the spatiotemporal distribution of particulate matter. To simplify the radiation calculations, the atmospheric CO<sub>2</sub> and O<sub>3</sub> concentrations were assumed to be constant throughout the year. However, atmospheric CO<sub>2</sub> and O<sub>3</sub> are subject to modulation by various sources, sinks, physical processes, and chemical processes (Ballantyne et al., 2012; Wang et al., 2019a). Additionally, rapid urbanization in China has led to an annual increase in CO<sub>2</sub> and O<sub>3</sub> concentrations (Guan et al., 2021; Wei et al., 2022), with elevated concentrations and growth rates primarily distributed in the eastern regions where urbanization is most prominent (Shi et al., 2016; Wang et al., 2017b). To more accurately simulate the atmospheric radiation balance and East Asian monsoon climate, it is necessary to incorporate spatiotemporal variations of CO<sub>2</sub> and O<sub>3</sub> concentrations into the radiation module. Therefore, we included the varying CO<sub>2</sub> and O<sub>3</sub> concentrations simulated by the model in the radiation module to calculate the corresponding radiative forcing.”

### 2.3.2 Photolysis (L170~181)

“The photolysis process was simulated using the Tropospheric Ultraviolet and Visible (TUV) model, which is commonly used to compute photolysis rates in various models (Tie et al., 2003; Shetter et al., 2002; Borg et al., 2011). The TUV model employs input parameters such as zenith angle, altitude, ozone column, SO<sub>2</sub> column, NO<sub>2</sub> column, aerosol optical depth (AOD), single scattering albedo (SSA), and albedo, among others, to calculate photolysis rates (Singh and Singh, 2004). However, in the TUV module of the RegCM-Chem-YIBs model, AOD and SSA were held constant. This is problematic as accurate aerosol optical parameters, such as AOD and SSA, play a crucial role in the photolysis of O<sub>3</sub> (Lefer et al., 2003). To address this issue, we incorporated temporally and spatially varying AOD and SSA simulated by the RegCM-Chem-YIBs model into the photolysis rate calculations in the TUV module. This enabled us to accurately incorporate the extinction effect of the varying particles into the photolysis reaction, leading to more realistic simulations of air components and regional meteorology.”

## References

- Ballantyne, A. P., Alden, C. B., Miller, J. B., Tans, P. P., and White, J. W. C.: Increase in observed net carbon dioxide uptake by land and oceans during the past 50 years, *Nature*, 488, 70-+, <https://doi.org/10.1038/nature11299>, 2012.
- Borg, I., Groenen, P. J. F., Jehn, K. A., Bilsky, W., and Schwartz, S. H.: Embedding the Organizational Culture Profile Into Schwartz's Theory of Universals in Values, *Journal of Personnel Psychology*, 10, 1-12, <https://doi.org/10.1027/1866-5888/a000028>, 2011.
- Guan, Y. R., Shan, Y. L., Huang, Q., Chen, H. L., Wang, D., and Hubacek, K.: Assessment to China's Recent Emission Pattern Shifts, *Earths Future*,

- 9,<https://doi.org/10.1029/2021ef002241>, 2021.
- Lefer, B. L., Shetter, R. E., Hall, S. R., Crawford, J. H., and Olson, J. R.: Impact of clouds and aerosols on photolysis frequencies and photochemistry during TRACE-P: 1. Analysis using radiative transfer and photochemical box models, *Journal of Geophysical Research-Atmospheres*, 108,<https://doi.org/10.1029/2002jd003171>, 2003.
- Shetter, R. E., Cinquini, L., Lefer, B. L., Hall, S. R., and Madronich, S.: Comparison of airborne measured and calculated spectral actinic flux and derived photolysis frequencies during the PEM Tropics B mission, *Journal of Geophysical Research-Atmospheres*, 108,<https://doi.org/10.1029/2001jd001320>, 2002.
- Shi, K. F., Chen, Y., Yu, B. L., Xu, T. B., Chen, Z. Q., Liu, R., Li, L. Y., and Wu, J. P.: Modeling spatiotemporal CO<sub>2</sub> (carbon dioxide) emission dynamics in China from DMSO-OLS nighttime stable light data using panel data analysis, *Applied Energy*, 168, 523-533,<https://doi.org/10.1016/j.apenergy.2015.11.055>, 2016.
- Singh, S. and Singh, R.: High-altitude clear-sky direct solar ultraviolet irradiance at Leh and Hanle in the western Himalayas: Observations and model calculations, *Journal of Geophysical Research-Atmospheres*, 109,<https://doi.org/10.1029/2004jd004854>, 2004.
- Tie, X. X., Madronich, S., Walters, S., Zhang, R. Y., Rasch, P., and Collins, W.: Effect of clouds on photolysis and oxidants in the troposphere, *Journal of Geophysical Research-Atmospheres*, 108,<https://doi.org/10.1029/2003jd003659>, 2003.
- Wang, N., Lyu, X. P., Deng, X. J., Huang, X., Jiang, F., and Ding, A. J.: Aggravating O<sub>3</sub> pollution due to NO<sub>x</sub> emission control in eastern China, *Science of the Total Environment*, 677, 732-744,<https://doi.org/10.1016/j.scitotenv.2019.04.388>, 2019a.
- Wang, W. N., Cheng, T. H., Gu, X. F., Chen, H., Guo, H., Wang, Y., Bao, F. W., Shi, S. Y., Xu, B. R., Zuo, X., Meng, C., and Zhang, X. C.: Assessing Spatial and Temporal Patterns of Observed Ground-level Ozone in China, *Scientific Reports*, 7,<https://doi.org/10.1038/s41598-017-03929-w>, 2017b.
- Wei, J., Li, Z. Q., Li, K., Dickerson, R. R., Pinker, R. T., Wang, J., Liu, X., Sun, L., Xue, W. H., and Cribb, M.: Full-coverage mapping and spatiotemporal variations of ground-level ozone (O<sub>3</sub>) pollution from 2013 to 2020 across China, *Remote Sensing of Environment*, 270,<https://doi.org/10.1016/j.rse.2021.112775>, 2022.

4. Line 162: “i,m=2008” should be the subscript.

**Response:** Thanks. Sorry for the mistake. We have revised.

5. Section 3.1: Why did you only compare simulations and observations in 2018? Did the model perform well in other years? I suggest you evaluate simulated surface meteorological variables because they significantly affect surface air pollutants. I also recommend you assess the spatial distribution of surface O<sub>3</sub> and CO<sub>2</sub>. For example, you can additionally evaluate model performance in key regions like NCP, YRD, and PRD apart from the whole domain.

**Response:** Thanks for your suggestion. We added the evaluations of meteorological

fields, O<sub>3</sub>, and CO<sub>2</sub> from 2015 to 2018.

Changes in manuscript (L238~261):

“Given that the monitoring of near-surface O<sub>3</sub> levels by CNEMC was initiated only in late 2013, the monitoring sites in 2013 and 2014 were limited, and the monitoring period was disjointed. As a result, in this study, we compared the simulated meteorological fields, O<sub>3</sub>, and CO<sub>2</sub> levels with observations only from 2015 to 2018.

Figures S1~4 demonstrated that the RegCM-Chem-YIBs model effectively captured the spatial distribution and magnitude of temperature, humidity, and wind over East Asia at 500 hPa, 850 hPa, and 1000 hPa between 2015 and 2018. However, due to the complex terrain's influence on the lower atmosphere, most models show better results at higher levels (Zhuang et al., 2018; Anwar et al., 2019; Xie et al., 2019). Thus, the simulations at 500 hPa were more consistent with the reanalysis data. At 1000 hPa, the simulated wind speed was slightly higher than the reanalysis data in eastern China. This difference may be due to common deficiencies in meteorological models, such as insufficient horizontal resolution, initial and boundary conditions, and physical parameterizations (Cassola and Burlando, 2012; Accadia et al., 2007), particularly in areas with low wind speeds (Carvalho et al., 2012).

Figures S5 and S6 demonstrated that the model accurately reproduced the observed increase in surface CO<sub>2</sub> and O<sub>3</sub> from 2015 to 2018, with high correlation coefficients ranging from 0.39 to 0.74 (Table 2). The model effectively captured the high concentrations of O<sub>3</sub> in major urban areas such as the NCP, the YRD, the PRD, the SCB, and the FWP, while also successfully reproducing the gradient in CO<sub>2</sub> concentrations between eastern and western China. However, the model slightly underpredicted MDA8 O<sub>3</sub> concentrations (-4.02 to -3.21 ppb) and overestimated CO<sub>2</sub> levels (3.32~7.07 ppm). These discrepancies are mainly attributed to uncertainties in the emissions inventory (Hong et al., 2017). Overall, the simulated meteorological factors and surface CO<sub>2</sub> and O<sub>3</sub> concentrations were deemed acceptable.”

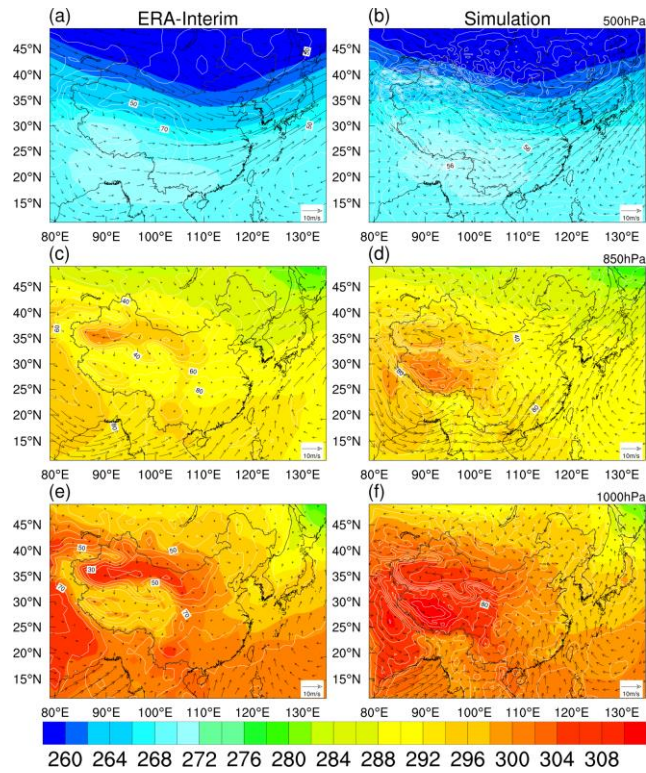

**Figure S1.** Comparisons between the simulated (a, c) and reanalysis (b, d) mean temperature (shading, units: K), wind (vectors, units: m/s), and relative humidity (contours, units: %) at 500 hPa (a, b), 850 hPa (c, d) and 1000 hPa (e, f) in 2015.

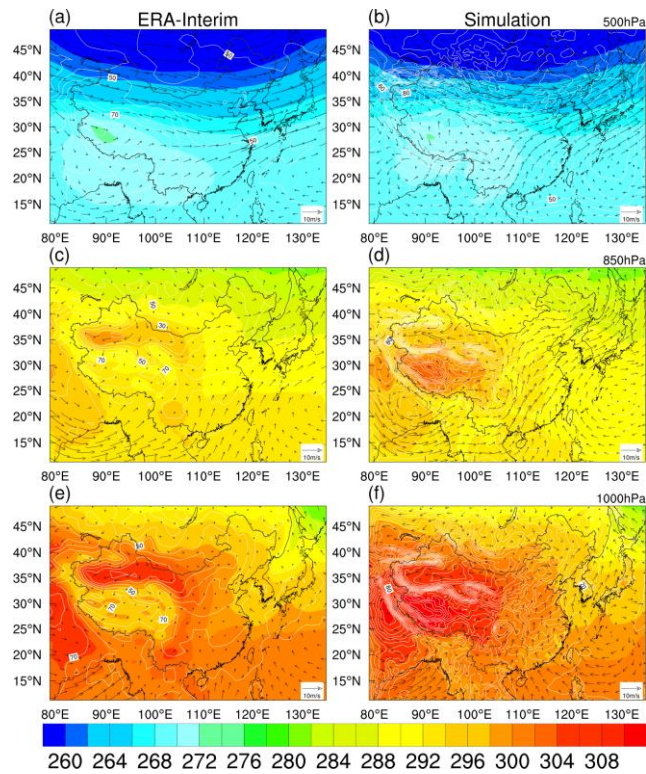

**Figure S2.** Comparisons between the simulated (a, c) and reanalysis (b, d) mean temperature (shading, units: K), wind (vectors, units: m/s), and relative humidity (contours, units: %) at 500 hPa (a, b), 850 hPa (c, d) and 1000 hPa (e, f) in 2016.

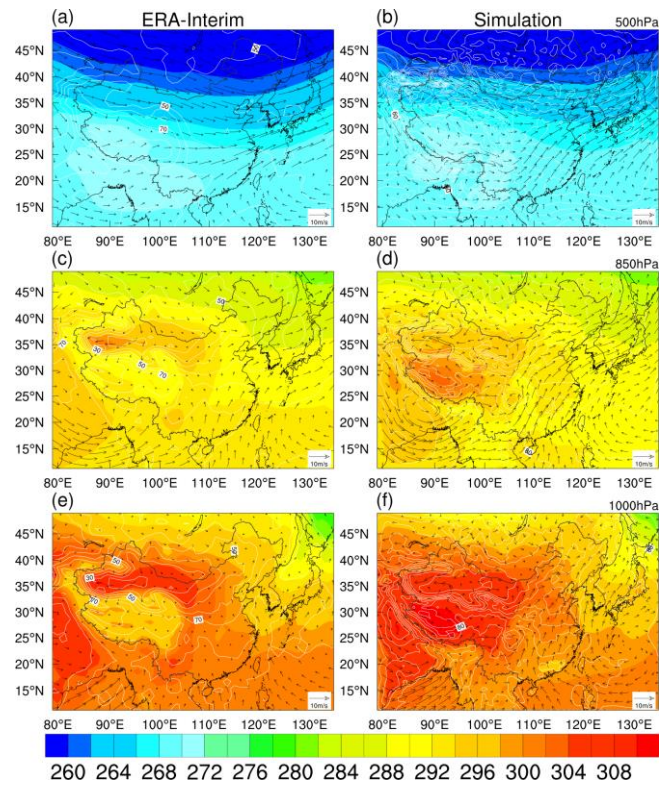

**Figure S3.** Comparisons between the simulated (a, c) and reanalysis (b, d) mean temperature (shading, units: K), wind (vectors, units: m/s), and relative humidity (contours, units: %) at 500 hPa (a, b), 850 hPa (c, d) and 1000 hPa (e, f) in 2017.

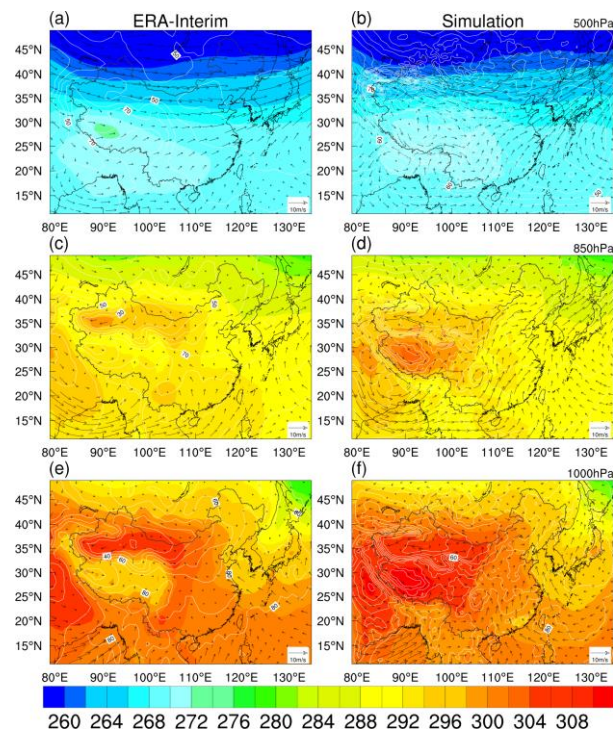

**Figure S4.** Comparisons between the simulated (a, c) and reanalysis (b, d) mean temperature (shading, units: K), wind (vectors, units: m/s), and relative humidity (contours, units: %) at 500 hPa (a, b), 850 hPa (c, d) and 1000 hPa (e, f) in 2018.



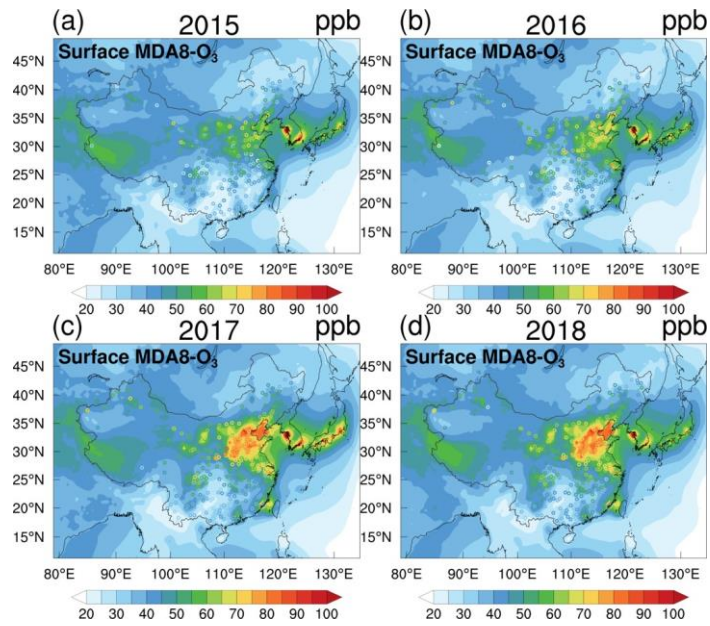

**Figure S5.** Comparisons between the simulated and observed surface MDA8 O<sub>3</sub> concentrations (units: ppb) during the summer monsoon period in (a)2015, (b)2016, (c)2017, (d)2018. Colored circles represent the observations.

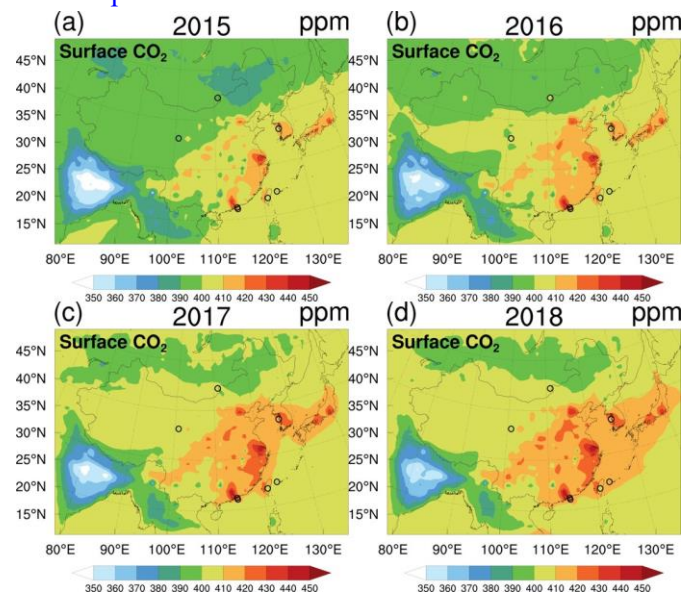

**Figure S6.** Comparisons between the simulated and observed surface CO<sub>2</sub> concentrations (units: ppm) during the summer monsoon period in (a)2015, (b)2016, (c)2017, (d)2018.

**Table 2.** Evaluations of the surface CO<sub>2</sub> (units: ppm) and MDA8 O<sub>3</sub> (units: ppb) during the summer monsoon period in East Asia.

| Species                   | Year | OBS    | SIM    | MB    | RMSE  | R    |
|---------------------------|------|--------|--------|-------|-------|------|
| CO <sub>2</sub> (ppm)     | 2015 | 402.82 | 406.98 | 4.16  | 9.37  | 0.44 |
|                           | 2016 | 407.12 | 410.44 | 3.32  | 8.22  | 0.69 |
|                           | 2017 | 408.35 | 413.62 | 5.27  | 11    | 0.39 |
|                           | 2018 | 409.61 | 416.68 | 7.07  | 11.32 | 0.41 |
| MDA8 O <sub>3</sub> (ppb) | 2015 | 48.77  | 44.75  | -4.02 | 29.39 | 0.57 |
|                           | 2016 | 50.16  | 46.95  | -3.21 | 27.56 | 0.60 |

|      |       |       |       |       |      |
|------|-------|-------|-------|-------|------|
| 2017 | 55.43 | 51.87 | -3.56 | 21.55 | 0.74 |
| 2018 | 55.53 | 52.08 | -3.42 | 24.78 | 0.73 |

OBS: observation; SIM: simulation; MB: bias; NMB: normalized mean bias; RMSE: root mean square error; R: correlation coefficient. MDA8 O<sub>3</sub>: the maximum daily 8-hour average O<sub>3</sub>.

## References

- Accadia, C., Zecchetto, S., Lavagnini, A., and Speranza, A.: Comparison of 10-m wind forecasts from a regional area model and QuikSCAT Scatterometer wind observations over the Mediterranean Sea, *Monthly Weather Review*, 135, 1945-1960, <https://doi.org/10.1175/mwr3370.1>, 2007.
- Anwar, S. A., Zakey, A. S., Robaa, S. M., and Wahab, M. M. A.: The influence of two land-surface hydrology schemes on the regional climate of Africa using the RegCM4 model (vol 136, pg 1535, 2019), *Theoretical and Applied Climatology*, 136, 1549-1550, <https://doi.org/10.1007/s00704-018-2588-0>, 2019.
- Carvalho, D., Rocha, A., Gomez-Gesteira, M., and Santos, C.: A sensitivity study of the WRF model in wind simulation for an area of high wind energy, *Environmental Modelling & Software*, 33, 23-34, <https://doi.org/10.1016/j.envsoft.2012.01.019>, 2012.
- Cassola, F. and Burlando, M.: Wind speed and wind energy forecast through Kalman filtering of Numerical Weather Prediction model output, *Applied Energy*, 99, 154-166, <https://doi.org/10.1016/j.apenergy.2012.03.054>, 2012.
- Hong, C. P., Zhang, Q., He, K. B., Guan, D. B., Li, M., Liu, F., and Zheng, B.: Variations of China's emission estimates: response to uncertainties in energy statistics, *Atmospheric Chemistry and Physics*, 17, 1227-1239, <https://doi.org/10.5194/acp-17-1227-2017>, 2017.
- Xie, X., Wang, T., Yue, X., Li, S., Zhuang, B., Wang, M., and Yang, X.: Numerical modeling of ozone damage to plants and its effects on atmospheric CO<sub>2</sub> in China, *Atmospheric Environment*, 217, <https://doi.org/10.1016/j.atmosenv.2019.116970>, 2019.
- Zhuang, B. L., Li, S., Wang, T. J., Liu, J., Chen, H. M., Chen, P. L., Li, M. M., and Xie, M.: Interaction between the Black Carbon Aerosol Warming Effect and East Asian Monsoon Using RegCM4, *Journal of Climate*, 31, 9367-9388, <https://doi.org/10.1175/jcli-d-17-0767.1>, 2018.

6. Line 243: This expression is ambiguous. Meteorological factors are favorable for ozone formation in summer.

**Response:** Thanks. We have revised the ambiguous expression.

Changes in manuscript (L300~301):

“Overall, the meteorological variations from 2008 to 2018 were unfavorable for the O<sub>3</sub> increase during the EASM period, as illustrated in Figure 3.”

7. Line 260-270: There are some contradictions in this part. You attributed the decrease in ozone concentration to increased cloud fraction, decreased SWF, increased precipitation, and enhanced wind speed. But how the warmer surface and higher PBL can accompany these conditions?

**Response:** Thanks. We have added some discussions on this aspect.

Changes in manuscript (L319~332):

“As we know, the formation of surface O<sub>3</sub> is promoted by rising temperatures (Steiner et al., 2010). However, increased surface temperatures can also intensify turbulence within the planetary boundary layer (PBL), increasing PBL height (Guo et al., 2016). This increase in PBL height, coupled with the enhanced upward motion, can transport near-surface pollutants to the upper atmosphere, reducing their concentration in the lower atmosphere (Gao et al., 2016). Additionally, the upward motion can also facilitate cloud formation and precipitation, resulting in a reduction of near-surface atmospheric pollutants via precipitation washout (Yoo et al., 2014).

We have improved the accuracy of O<sub>3</sub> photodissociation rate calculations by including varying AOD and SSA in the TUV module, as described in Section 2.3.2. As a result, the increase in cloud cover reduced the shortwave radiation flux and photochemical formation rates of near-surface O<sub>3</sub>, leading to decreased formation. Thus, the increase in near-surface temperature is often accompanied by an elevation in PBL height, enhanced cloud cover, precipitation, and reduced shortwave radiation. Moreover, higher wind speeds can enhance the dispersion of O<sub>3</sub> (Gorai et al., 2015).”

## References

- Gao, M., Carmichael, G. R., Wang, Y., Saide, P. E., Yu, M., Xin, J., Liu, Z., and Wang, Z.: Modeling study of the 2010 regional haze event in the North China Plain, *Atmospheric Chemistry and Physics*, 16, 1673-1691, <https://doi.org/10.5194/acp-16-1673-2016>, 2016.
- Gorai, A. K., Tuluri, F., Tchounwou, P. B., and Ambinakudige, S.: Influence of local meteorology and NO<sub>2</sub> conditions on ground-level ozone concentrations in the eastern part of Texas, USA, *Air Quality Atmosphere and Health*, 8, 81-96, <https://doi.org/10.1007/s11869-014-0276-5>, 2015.
- Guo, J. P., Miao, Y. C., Zhang, Y., Liu, H., Li, Z. Q., Zhang, W. C., He, J., Lou, M. Y., Yan, Y., Bian, L. G., and Zhai, P.: The climatology of planetary boundary layer height in China derived from radiosonde and reanalysis data, *Atmospheric Chemistry and Physics*, 16, 13309-13319, <https://doi.org/10.5194/acp-16-13309-2016>, 2016.
- Steiner, A. L., Davis, A. J., Sillman, S., Owen, R. C., Michalak, A. M., and Fiore, A. M.: Observed suppression of ozone formation at extremely high temperatures due to chemical and biophysical feedbacks, *Proceedings of the National Academy of Sciences of the United States of America*, 107, 19685-19690, <https://doi.org/10.1073/pnas.1008336107>, 2010.
- Yoo, J. M., Lee, Y. R., Kim, D., Jeong, M. J., Stockwell, W. R., Kundu, P. K., Oh, S. M., Shin, D. B., and Lee, S. J.: New indices for wet scavenging of air pollutants

(O<sub>3</sub>, CO, NO<sub>2</sub>, SO<sub>2</sub>, and PM<sub>10</sub>) by summertime rain, Atmospheric Environment, 82, 226-237, <https://doi.org/10.1016/j.atmosenv.2013.10.022>, 2014.

8. Figure 5: Please modify the value range of the color bar.

**Response:** Thanks for pointing that out. We have modified the value range of the color bar in Fig.5.

Changes in manuscript:

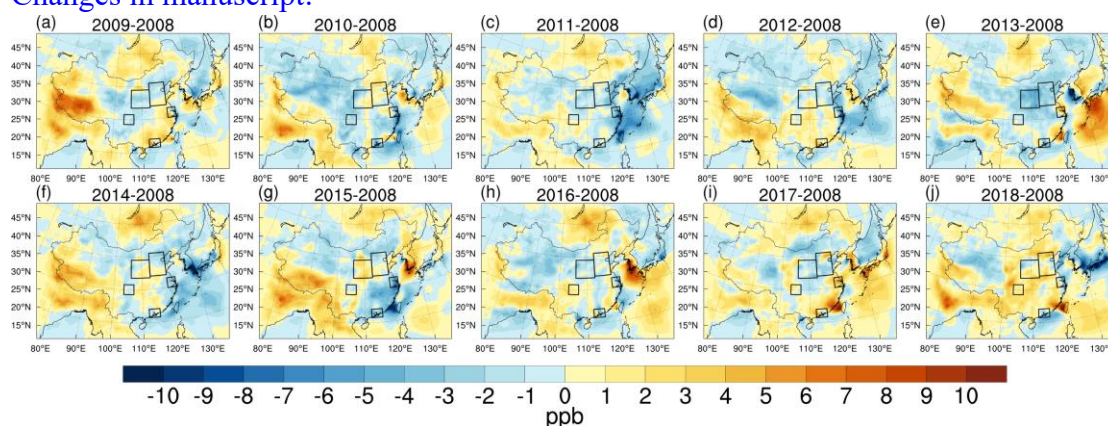

**Figure 3.** The responds of the surface MDA8 O<sub>3</sub> mixing ratios (units: ppb) to variations in meteorological conditions during the summer monsoon period in 2009 (a), 2010 (b), 2011 (c), 2012 (d), 2013 (e), 2014 (f), 2015 (g), 2016 (h), 2017 (i) and 2018 (j) relative to 2008.

9. Section 3.4: How did you quantify the contributions of isoprene and precipitation to ozone concentration?

**Response:** Thanks. We did not quantitatively differentiate the impacts of precipitation and isoprene on O<sub>3</sub> concentrations. In Section 3.4, we analyzed the impact of CO<sub>2</sub> on O<sub>3</sub> and provided explanations from two perspectives: isoprene emissions and precipitation changes. This approach facilitated a more comprehensive comprehension of the mechanisms that underlie the impact of CO<sub>2</sub> on O<sub>3</sub> concentrations. We have improved the statements in this section.

Changes in manuscript (L373~385):

“CO<sub>2</sub> is a significant driver of climate change and alterations in biogenic emissions. As shown in Figures 6 b and c, the impact of CO<sub>2</sub> on O<sub>3</sub> levels varies across locations, with a positive effect of 0.5~2 ppb along the southeastern coast of China but a negative influence of -0.5 to -2 ppb in the southwest and central China. CO<sub>2</sub> affects O<sub>3</sub> concentration by influencing both precipitation and isoprene emissions. In western and central China, CO<sub>2</sub> primarily affects O<sub>3</sub> concentration through its impact on precipitation (Table 5). Elevated CO<sub>2</sub> concentrations lead to increased precipitation (0.06~0.64 mm/day) in the FWP and SCB regions, resulting in a decrease in surface O<sub>3</sub> (up to -0.51 ppb). In eastern and southern coastal China, where vegetation is abundant, CO<sub>2</sub> has a greater impact on isoprene emissions. In the YRD region, decreased isoprene (-0.58 to -0.32 μg/m<sup>3</sup>) and increased precipitations (0.09~0.13 mm/day) reduced MDA8 O<sub>3</sub> levels (0.09~0.14 ppb). In PRD, increased

isoprene levels ( $0.31\sim 0.92\ \mu\text{g}/\text{m}^3$ ) and decreased precipitations ( $-1.02\sim -0.33\ \text{mm}/\text{day}$ ) led to the enhancement of MDA8  $\text{O}_3$  ( $0.28\sim 0.46\ \text{ppb}$ ).”

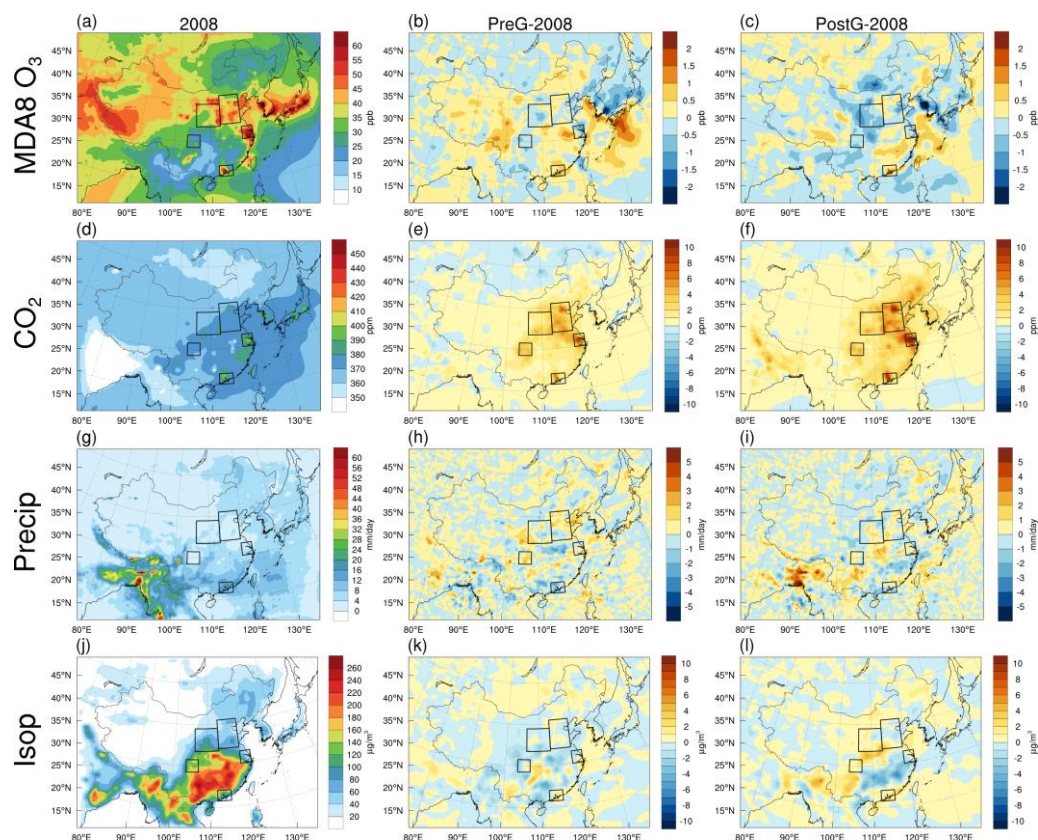

**Figure 6.** The simulated averaged MDA8  $\text{O}_3$  (a~c, units: ppb),  $\text{CO}_2$  (d~f, units: ppm), precipitation (g~i, units: mm/day), and isoprene mixing ratios (j~l, units:  $\mu\text{g}/\text{m}^3$ ) in 2008 from the base simulations (the left column) and their changes due to variations in  $\text{CO}_2$  emissions in PreG (2009~2013, the central column) and PostG (2014~2018, the right column) relative to 2008.

**Table 5.** Simulated responses of MDA8  $\text{O}_3$  mixing ratios (units: ppb),  $\text{CO}_2$  mixing ratios (units: ppm), precipitations (units: mm/day), and isoprene mixing ratios to the changes in  $\text{CO}_2$  emissions over North China Plain, Fenwei Plain, Yangtze River Delta, Pearl River Delta, and Sichuan Basin in PreG (2009~2013) and PostG (2014~2018) relative to 2008.

| Regions | Period | MDA8 $\text{O}_3$<br>(ppb) | $\text{CO}_2$<br>(ppm) | Precipitation<br>(mm/day) | Isoprene<br>( $\mu\text{g}/\text{m}^3$ ) |
|---------|--------|----------------------------|------------------------|---------------------------|------------------------------------------|
| NCP     | PreG   | 0.07                       | 3.19                   | 0.27                      | -0.1                                     |
|         | PostG  | -0.05                      | 4.24                   | 0.13                      | 0.26                                     |
| FWP     | PreG   | -0.11                      | 1.70                   | 0.21                      | -0.16                                    |
|         | PostG  | -0.51                      | 2.05                   | 0.06                      | 0.33                                     |
| YRD     | PreG   | -0.09                      | 4.1                    | 0.13                      | -0.32                                    |
|         | PostG  | -0.14                      | 6.2                    | 0.09                      | -0.58                                    |
| PRD     | PreG   | 0.46                       | 1.97                   | -1.02                     | 0.31                                     |
|         | PostG  | 0.28                       | 3.20                   | -0.33                     | 0.92                                     |
| SCB     | PreG   | -0.30                      | 2.80                   | 0.64                      | -0.78                                    |

|       |       |      |      |      |
|-------|-------|------|------|------|
| PostG | -0.30 | 2.78 | 0.21 | 0.69 |
|-------|-------|------|------|------|

10. Figure 7: Please modify the value range of the color bar.

**Response:** Thanks. We have modified the color bar in Fig.7.

Changes in manuscript:

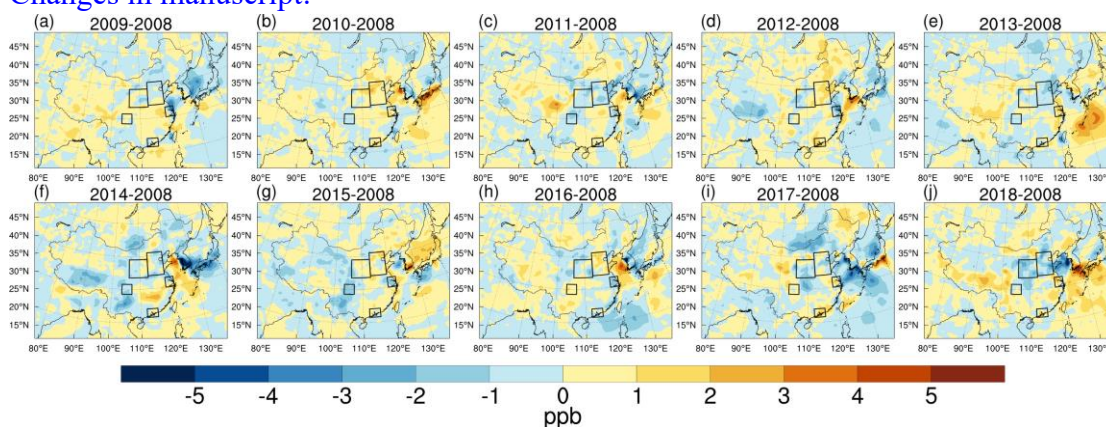

**Figure 5.** Simulated responses of surface MDA8 O<sub>3</sub> mixing ratios (units: ppb) to the variations in CO<sub>2</sub> emissions during the summer monsoon period in 2009 (a), 2010 (b), 2011 (c), 2012 (d), 2013 (e), 2014 (f), 2015 (g), 2016 (h), 2017 (i) and 2018 (j) relative to 2008.

11. Line 342-343: What did you mean by “due to the slight increase in air O<sub>3</sub> concentration”?

**Response:** Thanks. Sorry for the mistake. We have revised the erroneous expression.

Changes in manuscript (L432~433):

“In the PRD region, anthropogenic emissions led to a slight enhancement of O<sub>3</sub> by 2.33~5.74 ppb.”

12. Section 3.5: I suggest adding a figure or table showing emission trends of main air pollutants and precursors to support the explanation.

**Response:** Thanks for the suggestion. We have added Fig. S1 and Table S4 to illustrate the emission trend of SO<sub>2</sub>, NO<sub>x</sub>, VOCs, NH<sub>3</sub>, CO, PM<sub>10</sub>, PM<sub>2.5</sub>, and OC from the MEIC inventory.

Changes in manuscript:

(L413~422):“ Figure S8 and Table S1 illustrate that the levels of PM<sub>2.5</sub>, PM<sub>10</sub>, SO<sub>2</sub>, CO, and OC emissions remained consistently high during the PreG period. However, a linear decrease in emissions was observed after the implementation of the Clean Air Action Plan in 2013. Prior to 2013, the emission of VOCs increased steadily but subsequently stabilized. Similarly, the emission of nitrogen oxides (NO<sub>x</sub>) exhibited an upward trend before 2013, but since then, the emissions have shown a linear decrease, with each subsequent year exhibiting lower levels of NO<sub>x</sub> emissions. In comparison to other species, the emissions of ammonia (NH<sub>3</sub>) remained relatively stable from 2008 to 2018. Our analysis results of the emissions of different species

align with those of Zheng et al. (2018), who computed the changes of each species in the MEIC inventory from 2010 to 2017.”

(L442~448):“Before 2013, the continuous increase in VOCs and NO<sub>x</sub> emissions (Figure S8 b, c) facilitated the rise of O<sub>3</sub> levels. Following the implementation of the Clean Air Action Plan in 2013, the emissions of VOCs and NO<sub>x</sub> were regulated. However, with the decrease in PM<sub>2.5</sub> levels, direct radiation increased, and scattered radiation decreased (Figure 9), thereby promoting the photochemical formation of O<sub>3</sub> (Bian et al., 2007). In addition, the reduced NO emission weakened the titration effect (Figure S8 b), thus increasing surface O<sub>3</sub> (Li et al., 2022).”

**Table S1.** Changes in the model domain's anthropogenic emissions (Tg) from 2008 to 2018

| Year | SO <sub>2</sub> | NO <sub>x</sub> | VOCs | NH <sub>3</sub> | CO    | PM <sub>10</sub> | PM <sub>2.5</sub> | OC  |
|------|-----------------|-----------------|------|-----------------|-------|------------------|-------------------|-----|
| 2008 | 31.9            | 25.3            | 24.9 | 11.0            | 196.4 | 18.4             | 13.1              | 3.4 |
| 2009 | 29.9            | 25.7            | 25.5 | 11.0            | 196.4 | 17.7             | 12.7              | 3.4 |
| 2010 | 29.3            | 27.8            | 27.3 | 10.8            | 197.0 | 17.2             | 12.5              | 3.4 |
| 2011 | 30.7            | 30.1            | 28.5 | 11.2            | 193.3 | 17.5             | 12.6              | 3.4 |
| 2012 | 30.0            | 30.7            | 29.7 | 11.4            | 190.7 | 17.4             | 12.6              | 3.4 |
| 2013 | 26.9            | 29.1            | 29.7 | 11.3            | 186.8 | 16.7             | 12.0              | 3.3 |
| 2014 | 21.6            | 26.6            | 30.7 | 11.2            | 173.2 | 14.9             | 10.9              | 3.0 |
| 2015 | 17.9            | 24.9            | 30.1 | 11.2            | 162.4 | 13.0             | 9.7               | 2.7 |
| 2016 | 14.1            | 23.7            | 29.9 | 11.0            | 150.2 | 11.4             | 8.6               | 2.4 |
| 2017 | 11.1            | 23.1            | 30.2 | 10.9            | 144.1 | 10.8             | 8.1               | 2.2 |
| 2018 | 8.7             | 22.5            | 30.5 | 10.8            | 138.2 | 10.2             | 7.6               | 2.0 |

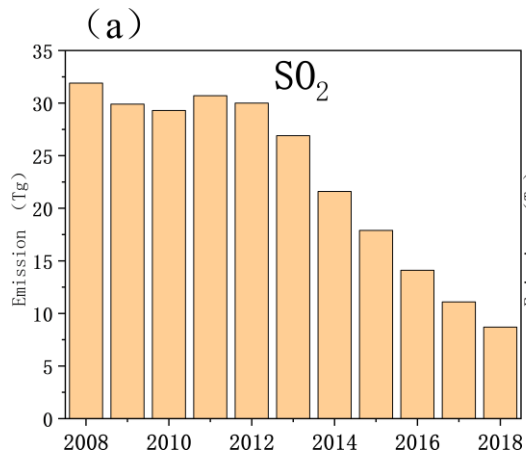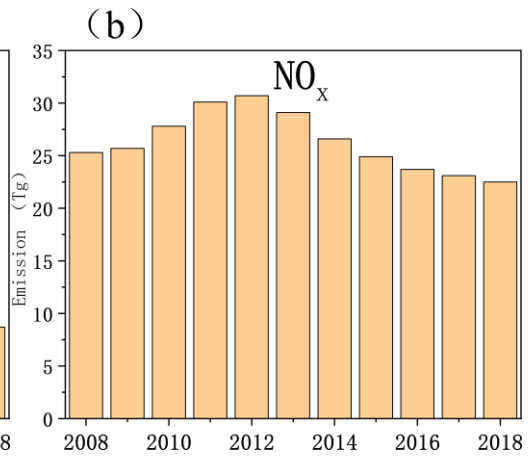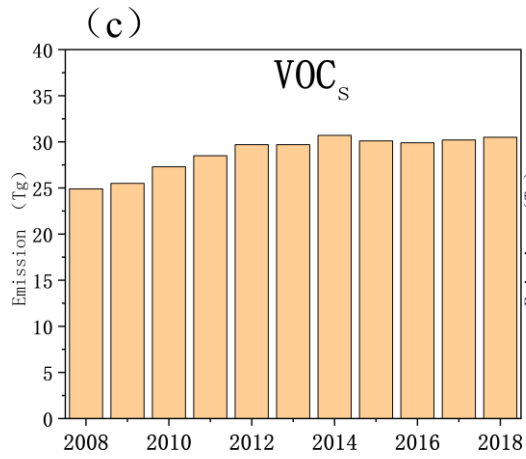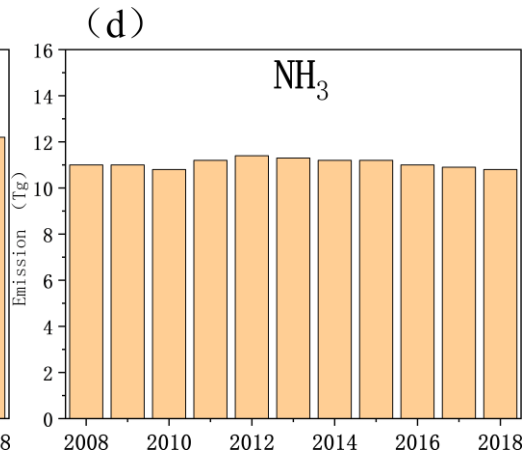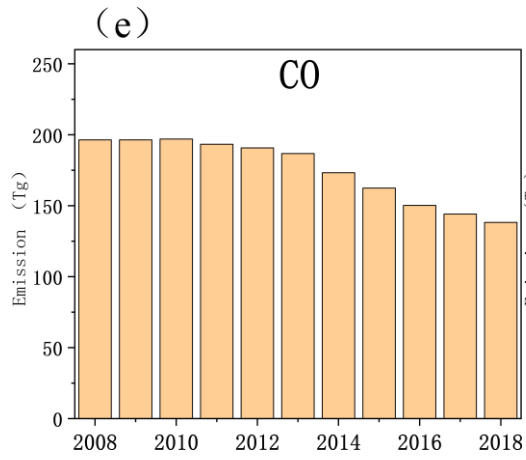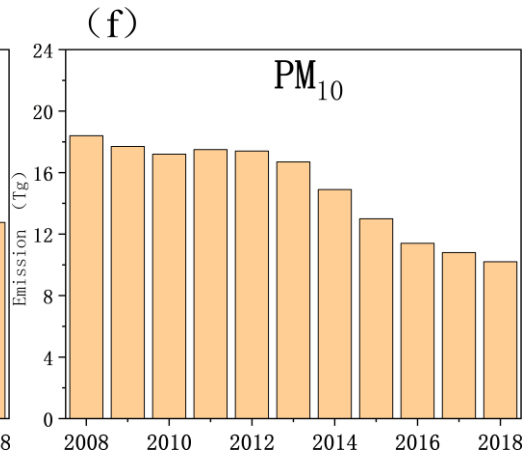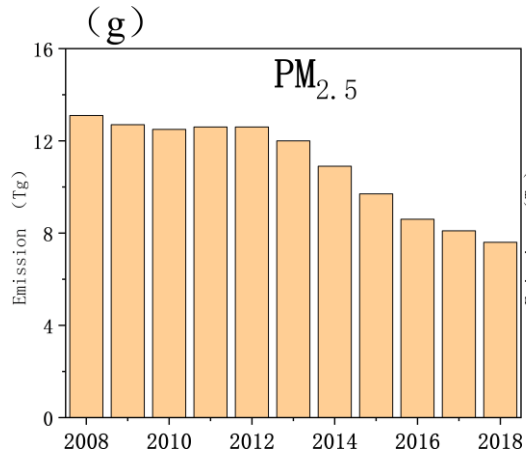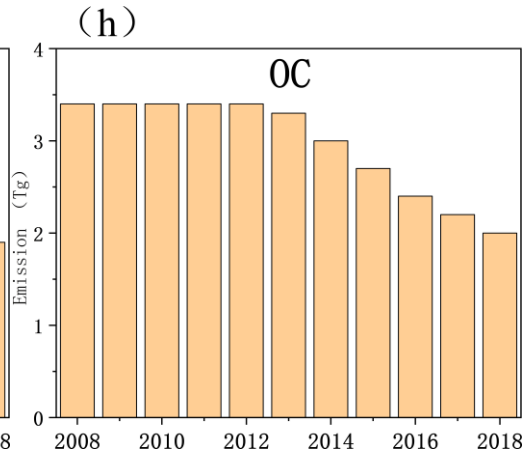



**Figure S8.** Changes in the anthropogenic emissions (Tg) from 2008 to 2018. The species include (a)SO<sub>2</sub>, (b)NO<sub>x</sub>, (c)VOCs, (d)NH<sub>3</sub>, (e)CO, (f)PM<sub>10</sub>, (g)PM<sub>2.5</sub>, (h)OC.

### References

- Bian, H., Han, S. Q., Tie, X. X., Sun, M. L., and Liu, A. X.: Evidence of impact of aerosols on surface ozone concentration in Tianjin, China, *Atmospheric Environment*, 41, 4672-4681,<https://doi.org/10.1016/j.atmosenv.2007.03.041>, 2007.
- Li, X. B., Yuan, B., Parrish, D. D., Chen, D. H., Song, Y. X., Yang, S. X., Liu, Z. J., and Shao, M.: Long-term trend of ozone in southern China reveals future mitigation strategy for air pollution, *Atmospheric Environment*, 269,<https://doi.org/10.1016/j.atmosenv.2021.118869>, 2022.
- Zheng, B., Tong, D., Li, M., Liu, F., Hong, C., Geng, G., Li, H., Li, X., Peng, L., Qi, J., Yan, L., Zhang, Y., Zhao, H., Zheng, Y., He, K., and Zhang, Q.: Trends in China's anthropogenic emissions since 2010 as the consequence of clean air actions, *Atmospheric Chemistry and Physics*, 18, 14095-14111,<https://doi.org/10.5194/acp-18-14095-2018>, 2018.
